# Supplementary material for: Prevalence and Correlates of Underweight among Women of Reproductive Age in Nepal: A Cross-Sectional Study
Source: MDPI journal article supplement (doi:10.3390/ijerph191811737), 2022-09-17
Supplement: s1 [file s1]

## Supplementary Materials:

**Table S1.** Explanatory variables categorisation based on the NDHS datasets.

| Categories               | Sub-Categories | Available DHS Categories                                                                                                                                       |
|--------------------------|----------------|----------------------------------------------------------------------------------------------------------------------------------------------------------------|
| Source of drinking water | Unimproved     | unprotected dug well/spring; tanker truck/cart with small tank; surface water; other                                                                           |
|                          | Improved       | piped into dwelling/yard/plot; piped to neighbour; public tap/standpipe; tube well or borehole; protected dug well; protected spring; rainwater; bottled water |
| Type of toilet facility  | Unimproved     | flush/pour flush not to sewer/septic tank/pit latrine; pit latrine without slab/open pit; other; no facility/bush/field                                        |
|                          | Improved       | flush/pour flush to piped sewer system/septic tank/pit latrine; ventilated improved pit (VIP) latrine; pit latrine with slab; composting toilet                |
| Cooking fuel             | Solid fuel     | wood; straw/shrubs/grass; animal dung; agricultural crop; coal/ignite; charcoal; other                                                                         |
|                          | Clean fuel     | electricity; LPG; natural gas; biogas; kerosene                                                                                                                |
| Main floor material      | Unimproved     | earth/sand; dung; wood planks; palm/bamboo; other                                                                                                              |
|                          | Improved       | parquet or polished wood; vinyl or asphalt strips; ceramic tiles; cement; carpet                                                                               |
| Main wall material       | Unimproved     | no wall; cane/palm/trunks; mud/sand; bamboo with mud; stone with mud; plywood; cardboard; reused wood; metal/galvanized sheet; other                           |
|                          | Improved       | cement; stone with lime/cement; bricks; cement blocks; wood planks/shingles                                                                                    |
| Main roof material       | Unimproved     | no roof; thatch/palm leaf; mud; rustic mat; palm/bamboo; wood planks; cardboard; other                                                                         |
|                          | Improved       | galvanized sheet/metal; wood; calamine/cement fibre; ceramic tiles; cement; roofing shingles                                                                   |

Note: The categorisation of explanatory variables based on the Nepal Demographic and Health Survey (NDHS) datasets was derived from our previous work [24].
